1     **An immune-CNS axis activates remote hippocampal stem**  
2             **cells following Spinal Transection Injury**

3     **Sascha Dehler<sup>1</sup>, Pak-Kin Lou<sup>1</sup>, Maxim Skabkin<sup>1</sup>, Sabrina Laudenklos<sup>1</sup>, Andreas**  
4     **Neumann<sup>1</sup>, Ana Martin-Villalba<sup>1\*</sup>**

5

6     <sup>1</sup> Molecular Neurobiology, German Cancer Research Center (DKFZ), Heidelberg, Germany

7     \*Correspondence:

8     Prof. Dr. Ana Martin-Villalba

9     a.martin-villalba@dkfz.de

10    **Keywords: neurogenesis, neural stem cells, hippocampus, spinal cord injuries, injury**  
11    **CD95/FAS, interferons**

12    **Abstract**

13    External stimuli such as injury, learning, or stress influence the production of neurons by  
14    neural stem cells (NSCs) in the adult mammalian brain. These external stimuli directly impact  
15    stem cell activity by influencing areas directly connected or in close proximity to the  
16    neurogenic niches of the adult brain. However, very little is known on how distant injuries  
17    affect NSC activation state. In this study we demonstrate that a thoracic spinal transection  
18    injury activates the distally located hippocampal-NSCs. This activation leads to a transient  
19    increase production of neurons that functionally integrate to improve animal's performance in  
20    hippocampal-related memory tasks. We further show that interferon-CD95 signaling is  
21    required to promote injury-mediated activation of remote NSCs. Thus, we identify an  
22    immune-CNS axis responsible for injury-mediated activation of remotely located NSCs.

## 23 **Introduction**

24 The process of generating new neurons in the adult mouse brain is best characterized in the  
25 ventricular-subventricular zone (V-SVZ) and the subgranular zone (SGZ) of the dentate  
26 gyrus. Neural stem cells (NSCs) within the V-SVZ generate neuronal precursors that migrate  
27 along the rostral migratory stream into the olfactory bulbs (OBs) where they disperse radially  
28 and generate functional interneurons that fine-tune odor discrimination. NSCs within the SGZ  
29 generate neuronal precursors that migrate short distance into the inner granule cell layer of the  
30 dentate gyrus where they become functionally integrated into the existing network (Gage,  
31 2000; Taupin & Gage, 2002; Zhao *et al.*, 2008; Ming & Song, 2011; Aimone *et al.*, 2014;  
32 Lim & Alvarez-Buylla, 2016). Hippocampal newborn neurons contribute to the formation of  
33 certain types of memories such as episodic and spatial memory (Kropff *et al.*, 2015), as well  
34 as regulation of mood (Sahay & Hen, 2007) or stress (Snyder *et al.*, 2011; Anacker *et al.*,  
35 2018). Adult neurogenesis is increased by various stimuli like an enriched environment,  
36 running and learning via neurotransmitters, hormones or growth factors (Kempermann *et al.*,  
37 1997, 2002; van Praag, Christie, *et al.*, 1999; van Praag, Kempermann, *et al.*, 1999; Nilsson *et*  
38 *al.*, 1999; Shors *et al.*, 2001; van Praag *et al.*, 2005; Leuner *et al.*, 2006; Lledo *et al.*, 2006;  
39 Kobilo *et al.*, 2011; Mustroph *et al.*, 2012; Alvarez *et al.*, 2016). In addition, endogenous  
40 NSCs can be activated by traumatic brain injury (Arvidsson *et al.*, 2002; Parent *et al.*, 2002;  
41 Thored *et al.*, 2006; Hou *et al.*, 2008; Liu *et al.*, 2009).

42 In this study we show that injury of the spinal cord transiently activates distantly located  
43 hippocampal stem cells. Some activated stem cells generate neurons in the hippocampal  
44 dentate gyrus that transiently improve performance of injured mice in spatial memory tasks as  
45 compared to uninjured controls. Other SGZ-stem cells are activated to migrate away from the  
46 dentate gyrus. Notably, we identify the interferon-gamma/CD95 signaling as necessary for  
47 activation of NSCs by a remote injury. In summary, our study unveils an immune-CNS  
48 interaction leading to injury-mediated activation of hippocampal neurogenesis.

## 49 **Material and Methods**

### 50 **Animals**

51 For the experiments we used the following mouse lines: C57BL/6N, NesCreER<sup>T2</sup>CD95flox  
52 [B6.Cg-Tg(Nestin-Cre/Ers1)#GSc Fastm1Cgn] and IFN $\alpha$ -/IFN $\gamma$ -R-KO [B6.Cg.Ifnar1tm1Agt  
53 Ifngr1tm1Agt / Agt]. Six weeks old NesCreER<sup>T2</sup>CD95flox (Cre<sup>+</sup>) and respective controls  
54 (Cre<sup>-</sup>) were intraperitoneally (i.p.) injected with 1mg Tamoxifen (Sigma) twice a day for 5  
55 consecutive days before operating. At the age of 12 weeks the respective group of mice  
56 received a sham or spinal transection injury as previously described (Letellier *et al.*, 2010).  
57 For short term labelling of NSCs, mice received i.p. BrdU (Sigma;300mg/kgbw) injections at  
58 1h, 24h and 48h post injury or a single shot injection 89 days post injury (Figure 1A, Figure  
59 4A and Figure 4E), followed by a chase time of 1 day, 2 weeks or 4 weeks, respectively. For  
60 the long term label retaining experiment (Figure 2A), 8 weeks old mice received a daily single  
61 shot injection of BrdU (50mg/kgbw) for a total duration of three weeks followed by a chase  
62 time of 16 weeks after the last BrdU injection. For the isolation of primary neural stem cells, 8  
63 weeks old C57BL/6N mice were used. All animals were housed in the animal facilities of the  
64 German Cancer Research Center (DKFZ) at a 12 hrs. dark/light cycle with free access to food  
65 and water. For the injury and behavioral experiments, exclusively age-matched female mice  
66 were used. All animal experiments were performed in accordance with the institutional  
67 guidelines of the DKFZ and were approved by the “Regierungspräsidium Karlsruhe”,  
68 Germany.

### 69 **Spinal Cord Injury**

70 Female, age-matched animals were subjected to laminectomy at spine T7-T8 followed by a  
71 80% transection of the spinal cord injury by cutting the spinal cord with iridectomy scissors,  
72 as described in (Demjen *et al.*, 2004; Stieltjes *et al.*, 2006; Letellier *et al.*, 2010). Sham mice  
73 were subjected only to laminectomy. Naïve mice did not face any surgical procedure.

### 74 **Handling of the Animals**

75 Mice were habituated to the handling experimenter before starting with behavioural  
76 experiments. To this end, mice were handled for 5-10 minutes twice a day. Handling was  
77 performed for at least 5 days until the animals showed no anxiety-related behaviour when  
78 meeting the experimenter.

## 79 **Spontaneous alternation in the T-maze**

80 Spatial working memory performance was assessed on an elevated wooden T-Maze as  
81 described in (Corsini *et al.*, 2009). Each animal had 4 sessions on the T-Maze (1 session/day;  
82 4 trials/session). One trial consisted of a choice and a sample run. During the choice run one  
83 of the two target arms was blocked by a barrier according to a pseudorandom sequence, with  
84 equal numbers of left and right turns per session and with no more than two consecutive turns  
85 in the same direction. The mice were allowed to explore the accessible arm. Before the  
86 sample run (intertrial interval of ~10 sec) the barrier was removed enabling accessibility to  
87 both arms. On the sample run the mouse was replaced back into the start arm facing the  
88 experimenter. The mouse was allowed to choose one of the two target arms. The trial was  
89 classified as success if the animal chose the previously blocked arm. For analysis all trials  
90 were combined and the success rate (%) was quantified ((# successful trials/# trials)\*100).

## 91 **Immunohistochemistry**

92 Animals were sacrificed by using an overdose of Ketamin (120mg/kg) / Xylazine (20mg/kg)  
93 and were subsequently transcardially perfused with 20ml 1xHBSS (Gibco) and 10ml of 4%  
94 paraformaldehyde (Carl Roth). The brains were dissected and postfixed in 4%  
95 paraformaldehyde overnight at 4 °C. A Leica VT1200 Vibratome was used to cut the tissue in  
96 50µm thick coronal sections. From each mouse six Brain sections every 300µm along the  
97 coronal axis were used for quantification. First, the brain sections were washed 3x 15 min at  
98 room temperature in TBS, followed by a 1hrs blocking step in TBS<sup>++</sup> (TBS with 0.3% horse  
99 serum (Millipore) and 0.25% Triton-X100 (Sigma)) at room temperature. Tissue was  
100 transferred to 0.5ml Safe Lock Reaction-Tubes containing 200µl TBS<sup>++</sup> including primary  
101 antibodies. Samples were incubated for 24-48 hours at 4°C. After incubating with primary  
102 antibody, tissue samples were washed 3x 15min in TBS at room temperature, followed by a  
103 30 min blocking step in TBS<sup>++</sup> at room temperature. Brain sections were transferred to 0.5ml  
104 Safe Lock Reaction-Tubes containing 200µl TBS<sup>++</sup> including secondary antibodies. Samples  
105 were incubated in the dark, for 2 hrs at room temperature. Finally the brain slices were  
106 washed 4x 10 min in TBS at room temperature, before they were further floated in 0.1M PB-  
107 Buffer and mounted on glass slides with Fluoromount G (eBioscience). The following  
108 antibodies were used: rat anti-BrdU (Abcam, 1/150), goat anti-DCX (Santa Cruz, 1/200) and  
109 mouse anti-NeuN (Merck Millipore, 1/800). Nuclei were counterstained with Hoechst 33342  
110 (Biotrend, 1/4000).

## 111 **Microscopy and Cell Quantification**

112 All images were acquired with a Leica TCS SP5 AOBS confocal microscope (Leica)  
113 equipped with a UV diode 405nm laser, an argon multiline (458-514nm) laser, a helium-neon  
114 561nm laser and a helium-neon 633nm laser. Images were acquired as multichannel confocal  
115 stacks (Z-plane distance 2 $\mu$ m) in 8-bit format by using a 20 $\times$  (HCX PL FLUOTAR L  
116 NA0.40) oil immersion objective. Images were processed and analyzed in ImageJ (NIH). For  
117 representative images, the maximum intensity of a variable number of Z-planes was stacked,  
118 to generate the final Z-projections. Representative images were adjusted for brightness and  
119 contrast, applied to the entire image, cropped, transformed to RGB color format and  
120 assembled into figures with Inkscape. For cell quantification the entire volume of the DG was  
121 calculated by multiplying the entire area of the DG (middle plane of the total Z-stack) with  
122 the entire Z-stack size. The different cell populations were identified and counted (LOCI and  
123 Cell-Counter pug-in for ImageJ) based on their antibody labeling profile. Cell counts were  
124 either represented as Cells/mm<sup>3</sup>DG or as Cells/DG.

## 125 ***In vitro* culturing and treatment of NSCs with INF $\gamma$**

126 The lateral SVZ was microdissected as a whole mount as previously described (Mirzadeh *et*  
127 *al.*, 2010). Tissue of one mouse was digested with trypsin and DNase according to the Neural  
128 Tissue Dissociation Kit (Miltenyi Biotec) in a Gentle MACS Dissociator (Miltenyi Biotec).  
129 Cells were cultured and expanded for 8-12 days in Neurobasal medium (Gibco) supplemented  
130 with B27 (Gibco), Heparine (Sigma), Glutamine (Gibco), Pen/Strep (Gibco), EGF  
131 (PromoKine) and FGF (PeloBiotech) as used in (Walker & Kempermann, 2014). For  
132 stimulation with INF $\gamma$  (Millipore), 4x10<sup>5</sup> cells were seeded. The next day, cells were treated  
133 with 50ng INF $\gamma$  / ml media for duration of 14 hours.

## 134 **Flow Cytometric Analysis**

135 The cells were harvested and were treated with Accutase (Sigma) for 5 min at 37 °C, followed  
136 by filtering the cells with a 40 $\mu$ m cell strainer to get a single cell suspension. Afterwards the  
137 cells were washed twice with FACS media (PBS/10%FCS) and were re-suspend in 200 $\mu$ l  
138 FACS media. Cells were stained for 30 min at room temperature by using the Jo2  
139 CD95::PECy7 antibody (BD Pharming/ 1/100). Afterwards the cells were washed three times  
140 with FACS media and were finally re-suspend in 200 $\mu$ l FACS media.

## 141 **Results**

142

### 143 **Enhanced Hippocampal neurogenesis following spinal cord injury**

144 To assess whether a remote CNS injury would activate NSCs in the SGZ, we injured the  
145 spinal cord at thoracic level T7-T8. In order to detect the reaction of SGZ-NSCs and their  
146 neurogenic progeny, we labeled these cells with 5-Bromo-2-deoxyuridine (BrdU; once daily)  
147 at the time of injury and in the following 24h, 48h or after 89 days and examined them at 2d,  
148 2 weeks, 4 weeks and 13 weeks following injury (Figure 1A). Brains were stained for BrdU,  
149 to follow actively dividing NSCs (BrdU), quiescent NSCs and neuroblasts (Figure 1B).  
150 Already 48 hours after injury, we observed a significant increase in new-born neuroblasts  
151 (BrdU<sup>+</sup>/DCX<sup>+</sup>) and an increased number of BrdU<sup>+</sup>/DCX<sup>-</sup> cells (Figure 1C-E). 2 weeks  
152 following injury, the number of BrdU<sup>+</sup>/DCX<sup>-</sup> cells and neuroblasts was significantly higher  
153 when compared to sham-injured controls (Figure 1F-H). We further assessed the maturation  
154 of BrdU-labelled cells to neurons (BrdU<sup>+</sup>/NeuN<sup>+</sup>) at 4 weeks after the injury. Significantly  
155 more newborn neurons were identified in the dentate gyrus of the injured mice, whereas the  
156 number of BrdU<sup>+</sup>/DCX<sup>-</sup> cells was comparable in injured and sham controls (Figure 1I-K).  
157 Notably, at 13 weeks following injury, the number of cycling BrdU<sup>+</sup>/DCX<sup>-</sup> cells and newborn  
158 neuroblasts was set back to basal levels, exhibiting similar numbers to that of its sham  
159 operated counterparts (Figure 1L-N). Together, our data showed that distant spinal cord injury  
160 stimulates a fast but transient activation of NSCs in the remote SGZ to generate neurons.

### 161 **Spinal Cord Injury induced migration out of the dentate gyrus of dormant SGZ-NSCs**

162 Injury has been shown to activate a pool of highly dormant cells in the hematopoietic system  
163 (Wilson *et al.*, 2008; Essers *et al.*, 2009; Essers & Trumpp, 2010). To test if this is also the  
164 case for SGZ-NSCs, we used a three weeks BrdU-labelling protocol starting at the age of 8-  
165 weeks and allowed a chase time of 16 weeks after the last BrdU injection. Mice were  
166 subjected to spinal cord injury at 14 weeks chase time or left uninjured and sacrificed two  
167 weeks later to follow the reaction to injury of the highly dormant NSCs (Figure 2A). Notably,  
168 the number of BrdU<sup>+</sup> cells in the DG was significantly reduced in injured mice as compared  
169 to sham controls (Figure 2B-C). The default program for SGZ-NSCs is to become active and  
170 produce neuroblasts that further mature to granule cell neurons within the dentate gyrus. Yet,  
171 it is known that upon injury some NSCs in close vicinity start migrating out of the neurogenic  
172 niche (Nakatomi *et al.*, 2002; Grande *et al.*, 2013). Therefore we assessed a potential

173 migration of BrdU-labelled cells to the neighboring regions of the fimbria-fornix (FF) and  
174 corpus callosum (CC) (Figure 2B). The quantification of BrdU<sup>+</sup> cells in the FF and the CC  
175 showed a trend to an increased number of BrdU-labelled cells in these nearby regions in  
176 injured mice as compared to naïve counterparts (Figure 2D-E). In summary our data suggest  
177 that spinal cord injury activates alternative migratory pathways in a pool of highly dormant,  
178 long-term label-retaining SGZ-NSCs.

### 179 **Spinal Cord Injury leads to better Working Memory**

180 Together we see that the injury activates both, normal homeostatic neurogenesis and  
181 decreases the pool of highly dormant stem cells potentially by activating their migration out  
182 of the dentate gyrus. Therefore, we next tested the function of the injury-induced surplus of  
183 newborn neurons within the hippocampus of injured mice, homeostatic neurogenesis. Adult  
184 hippocampal neurogenesis has been shown to positively impact short- and long-term spatial  
185 working memory, navigation learning, pattern discrimination as well as trace and contextual  
186 fear conditioning (Corsini *et al.*, 2009 Deng *et al.*, 2010; Aimone *et al.*, 2011), but also to  
187 counteract depression- and stress-induced behavioral responses (Sahay & Hen, 2007; Snyder  
188 *et al.*, 2011). To test the function of injury-induced newborn neurons in the dentate gyrus, we  
189 tested the performance of injured and naïve mice in a hippocampal-dependent task, the  
190 spontaneous alternation on an elevated T-Maze, used as readout of short term spatial working  
191 memory (Figure 3A). Mice were tested at two, four and eight weeks following spinal cord  
192 injury. At two weeks post-injury naïve, sham and spinal cord injured mice showed a similar  
193 success rate of the spontaneous alternation (Figure 3B). Importantly, at four weeks following  
194 injury, the success rate of injured mice was significantly higher than the rate of Sham controls  
195 (Figure 3C). Notably, the improved performance of injured mice on the T-Maze disappeared  
196 at eight weeks post-injury (Figure 3D). Taken together, our data demonstrated that newly  
197 generated neurons integrate into the existing hippocampal network and positively influence  
198 the performance of injured mice in a hippocampal-dependent spatial memory task. However,  
199 as the observed activation of neurogenesis, the functional improvement is also transient.  
200 Interestingly, we previously observed a transient increase in neurogenesis following exercise  
201 that improved performance on the T-Maze in an equally transient mode (Corsini *et al.*, 2009).  
202 Taken together, our data suggest that the newborn functionally immature neurons impact short  
203 term memory as long as they are young and plastic. However, this effect disappears as they  
204 become similar to their older counterparts (Kropff *et al.*, 2015).



205 **Loss of IFN $\alpha$ -/IFN $\gamma$ -R and CD95 inhibits neural stem cell activation upon spinal**  
206 **transection injury**

207 Acute tissue injury activates an immediate inflammatory response that is able to rapidly affect  
208 distant locations. Notably, we previously identified interferons as an activator of NSCs in the  
209 V-SVZ following a global ischemic insult that induces damage in the nearby located striatum  
210 (Llorens-Bobadilla *et al.*, 2015). The requirement of IFN $\gamma$  signalling for SCI-mediated  
211 activation of SGZ-NSCs was further tested using mice deficient in IFN $\alpha$ -/IFN $\gamma$ -receptor as  
212 compared to wt counterparts (Figure 4A, Figure 1F-H). Excitingly, two weeks following  
213 injury, IFN $\alpha$ -/IFN $\gamma$ -receptor deficient mice did neither show a significant increase in the  
214 population of neuroblasts (BrdU<sup>+</sup>/DCX<sup>+</sup>), nor in the population of BrdU<sup>+</sup>/DCX<sup>-</sup> cells (Figure  
215 4B-D). These observations indicated that spinal transection injury does not activate SGZ-  
216 NSCs lacking a functional IFN $\alpha$ /IFN $\gamma$ -signaling-pathway. We next investigated the putative  
217 signalling pathways involved in local SCI-mediated activation of SGZ-NSCs. Interferons  
218 have been reported to increase the expression of CD95-ligand and CD95 (Chow *et al.*, 2000;  
219 Kirchhoff *et al.*, 2002; Boselli *et al.*, 2007). In a previous study we demonstrated that the  
220 TNF-R family member, CD95, is required for the activation of SGZ-NSCs following global  
221 ischemia (Corsini *et al.*, 2009). To test the regulation of CD95 upon IFN $\gamma$  treatment in NSCs,  
222 we isolated NSCs from the V-SVZ of 8 weeks old C57BL/6N mice, cultured them in vitro for  
223 short time and exposed them for 14 hours to IFN $\gamma$ . Thereafter expression of CD95 was  
224 analysed by Flow Cytometry. IFN $\gamma$  significantly increased the expression of CD95 in NSCs  
225 as compared to untreated NSCs (Figure 4H and Supplementary Figure S1). To assess CD95's  
226 involvement in SCI-induced neurogenesis we used the NesCreER<sup>T2</sup>CD95<sup>fl/fl</sup> mouse line. This  
227 mouse line enables an acute deletion of CD95 in the adult neural stem cell compartment  
228 (Corsini *et al.*, 2009). CD95NesCreER<sup>T2+</sup> (Cre<sup>+</sup>) and CD95NesCreER<sup>T2-</sup> (Cre<sup>-</sup>) mice received  
229 tamoxifen injections at 6 weeks of age. Their spinal cord was injured at the age of 12 weeks.  
230 Dividing cells were labelled by BrdU at the time of injury and 24 hours post injury. The SGZ  
231 was further processed for staining of BrdU and DCX 48 hours after the surgery (Figure 4E).  
232 CD95-deficient NSCs exhibit an impaired injury-induced activation, as fewer BrdU<sup>+</sup>/DCX<sup>-</sup>  
233 cells and newborn neuroblasts (BrdU<sup>+</sup>/DCX<sup>+</sup>) could be detected in the SGZ of Cre<sup>+</sup> mice as  
234 compared to their injured Cre<sup>-</sup> counterparts (Figure 4F-G). Thus, CD95 is locally involved in  
235 activation of SGZ-NSCs by a remote injury. Next, we set out to test if the injury-induced  
236 improvement of the spatial working-memory is due to the increased activation of NSCs.  
237 Indeed, injured and sham operated IFN $\alpha$ -/IFN $\gamma$ -receptor deficient mice showed a similar  
238 success rate in the spontaneous alternation in the elevated T-Maze (Figure 4I-K). Thus,



239 interferon-related increased of homeostatic neurogenesis mediates the functional  
240 improvement in short-term working memory exhibited by spinal injured animals. Altogether,  
241 our results indicate that injury-induced IFN signaling triggers CD95 activation of SGZ-NSCs,  
242 thereby leading to a transient expansion of the pool of newborn neurons resulting in an  
243 improved working memory.

## 244 **Discussion**

245 Here, we examine how a remote injury to the CNS influences distally located SGZ-NSCs,  
246 short and long term post-injury. Our data clearly show an acute and transiently increased  
247 activation of adult SGZ-NSCs to produce neurons following a remote injury and suggest that  
248 a fraction of highly dormant stem cells are activated to migrate out of the neurogenic niche.  
249 Notably, we show that the newly generated neurons functionally integrate into the existing  
250 network, as demonstrated in an elevated spatial navigation performance. However, this  
251 activation of neurogenesis fades away with time. Accordingly, two studies investigated the  
252 effects of spinal cord injury to the neurogenic niches in adult *Sprague-Dawley* rats and  
253 detected a decreased level of adult v-SVZ and SGZ neurogenesis 60 days post spinal cord  
254 injury (Felix *et al.*, 2012; Jure *et al.*, 2017). Besides, studies of hematopoietic stem cell (HSC)  
255 activation by inflammatory signals, show that an acute exposure activates the quiescent  
256 population of HSCs, whereas chronic exposure negatively impact HSC activation (Essers *et*  
257 *al.*, 2009).

258 As already hypothesized by Felix and colleagues (Felix *et al.*, 2012) and in line with Essers et  
259 al. (Essers *et al.*, 2009) we show that inflammatory signatures, released in an acute phase post  
260 spinal cord injury, play a major role in transmitting the injury signal towards the hippocampus  
261 to activate adult neurogenesis. By using single cell transcriptomics we have shown before that  
262 interferon-gamma is an important factor in activating v-SVZ neurogenesis in a model of  
263 global ischemia (Llorens-Bobadilla *et al.*, 2015). In the current study, we identify interferons  
264 as the main factor that transmits the injury signal from the spinal cord towards the  
265 hippocampus, where through activation of CD95 stem cells exit the quiescent state to  
266 differentiate into neurons. The observed transition from a quiescent to an active state,  
267 triggered by a distant injury site, in effects seems to be similar to the transition from  $G_0$  to an  
268 elevated  $G_{\text{alert}}$  state in muscle satellite cells (Rodgers *et al.*, 2014). Interestingly, this alert state  
269 is triggered in distant stem cells in contralateral muscles, and is also observed in other tissue  
270 stem cells such as hematopoietic stem cells (Rodgers *et al.*, 2014). Stem cells in an alert state  
271 are primed for cell cycle entry to react in a much faster and efficient way to incoming injuries

272 of different nature. Here we show that a remote CNS injury triggers different responses in  
273 actively dividing and dormant NSCs. While actively dividing NSCs are engaged in  
274 homeostasis, the fraction of dormant cells decreases, presumably to take alternative migratory  
275 pathways to injury-associated areas. However, future studies are needed to follow up the fate  
276 of these highly dormant stem cells.

277 What could be the role of an increased production of granule cell neurons in the  
278 hippocampus? Certainly, spinal cord injury represents a very stressful state for the whole  
279 organism. It has been shown that adult hippocampal neurogenesis is on the one hand strongly  
280 influenced by chronic and acute stress (Conrad *et al.*, 1999; Kirby *et al.*, 2013; LaDage,  
281 2015), on the other hand increased neurogenesis ameliorates stress (Snyder *et al.*, 2011;  
282 Anacker *et al.*, 2018). Thus, we speculate that the elevated levels of neurogenesis upon spinal  
283 cord injury might buffer injury-induced stress and enable an improved behavioral adaptation  
284 to the post injury situation.

285 In summary, our data show that an acute injury to the spinal cord activates hippocampal  
286 neurogenesis, resulting in a transiently increased production of newborn neurons that are  
287 functional, as shown by the improved performance in spatial memory tasks of injured mice.  
288 Furthermore, we identified interferons as a major factor involved in activation via CD95 of  
289 distant stem cells.

## 290 **Conflict of Interest**

291 The authors declare that the research was conducted in the absence of any commercial or  
292 financial relationships that could be construed as a potential conflict of interest.

## 293 **Author Contributions**

294 S.D. performed experiments, analyzed and interpreted data, and prepared the manuscript.  
295 P.L.; M.S.; S.L and A.N. performed experiments and analyzed data. A.M.-V. took over the  
296 conceptual design and the study coordination, interpreted data, and prepared the manuscript.

## 297 **Funding**

298 This work was supported by the German Cancer Research Center (DKFZ), the German  
299 science foundation (SFB 873), and the German federal ministry of education and research  
300 (BMBF).

## 301 **Acknowledgements**

302 We thank C. Pitzer and the members of the Interdisciplinary Neurobehavioral Core (INBC);  
303 M. Essers for *Ifngr1<sup>-/-</sup>* and *Ifnar<sup>-/-</sup>* mice; S. Limpert, K.Volk and M.Richter for technical  
304 assistance; the Light Microscopy Core Facility; the DKFZ Flow Cytometry Core Facility; and  
305 the members of the Martin-Villalba laboratory for critically reading the manuscript.

## 306 **References**

307

308 Aimone, J.B., Deng, W., & Gage, F.H. (2011) Resolving New Memories: A Critical Look at  
309 the Dentate Gyrus, Adult Neurogenesis, and Pattern Separation. *Neuron*, **70**, 589–596.

310 Aimone, J.B., Li, Y., Lee, S.W., Clemenson, G.D., Deng, W., & Gage, F.H. (2014)  
311 Regulation and Function of Adult Neurogenesis: From Genes to Cognition. *Physiol.*  
312 *Rev.*, **94**, 991–1026.

313 Alvarez, D.D., Giacomini, D., Yang, S.M., Trincherro, M.F., Temprana, S.G., Büttner, K.A.,  
314 Beltramone, N., & Schinder, A.F. (2016) A disynaptic feedback network activated by  
315 experience promotes the integration of new granule cells. *Science (80-. )*, **354**, 459–465.

316 Anacker, C., Luna, V.M., Stevens, G.S., Millette, A., Shores, R., Jimenez, J.C., Chen, B., &  
317 Hen, R. (2018) Hippocampal neurogenesis confers stress resilience by inhibiting the  
318 ventral dentate gyrus. *Nature*, 1.

319 Arvidsson, A., Collin, T., Kirik, D., Kokaia, Z., & Lindvall, O. (2002) Neuronal replacement  
320 from endogenous precursors in the adult brain after stroke. *Nat. Med.*, **8**, 963–970.

321 Boselli, D., Losana, G., Bernabei, P., Bosisio, D., Drysdale, P., Kiessling, R., Gaston, J.S.H.,  
322 Lammas, D., Casanova, J.L., Kumararatne, D.S., & Novelli, F. (2007) IFN-gamma  
323 regulates Fas ligand expression in human CD4+ T lymphocytes and controls their anti-  
324 mycobacterial cytotoxic functions. *Eur. J. Immunol.*, **37**, 2196–2204.

325 Chow, W. a, Fang, J.J., & Yee, J.K. (2000) The IFN regulatory factor family participates in  
326 regulation of Fas ligand gene expression in T cells. *J. Immunol.*, **164**, 3512–3518.

327 Conrad, C.D., Lupien, S.J., & McEwen, B.S. (1999) Support for a bimodal role for type II  
328 adrenal steroid receptors in spatial memory. *Neurobiol. Learn. Mem.*, **72**, 39–46.

329 Corsini, N.S., Sancho-Martinez, I., Laudenklos, S., Glasgow, D., Kumar, S., Letellier, E.,  
330 Koch, P., Teodorczyk, M., Kleber, S., Klussmann, S., Wiestler, B., Brüstle, O., Mueller,  
331 W., Gieffers, C., Hill, O., Thiemann, M., Seedorf, M., Gretz, N., Sprengel, R., Celikel,  
332 T., & Martin-Villalba, A. (2009) The death receptor CD95 activates adult neural stem  
333 cells for working memory formation and brain repair. *Cell Stem Cell*, **5**, 178–190.

334 Demjen, D., Klussmann, S., Kleber, S., Zuliani, C., Stieltjes, B., Metzger, C., Hirt, U. a,  
335 Walczak, H., Falk, W., Essig, M., Edler, L., Krammer, P.H., & Martin-Villalba, A.  
336 (2004) Neutralization of CD95 ligand promotes regeneration and functional recovery

- 337 after spinal cord injury. *Nat. Med.*, **10**, 389–395.
- 338 Deng, W., Aimone, J.B., & Gage, F.H. (2010) New neurons and new memories: how does  
339 adult hippocampal neurogenesis affect learning and memory? *Nat. Rev. Neurosci.*, **11**,  
340 339–350.
- 341 Essers, M. a G., Offner, S., Blanco-Bose, W.E., Waibler, Z., Kalinke, U., Duchosal, M. a, &  
342 Trumpp, A. (2009) IFN $\alpha$  activates dormant haematopoietic stem cells in vivo.  
343 *Nature*, **458**, 904–908.
- 344 Essers, M.A.G. & Trumpp, A. (2010) Targeting leukemic stem cells by breaking their  
345 dormancy. *Mol. Oncol.*, **4**, 443–450.
- 346 Felix, M.-S., Popa, N., Djelloul, M., Boucraut, J., Gauthier, P., Bauer, S., & Matarazzo, V. a.  
347 (2012) Alteration of Forebrain Neurogenesis after Cervical Spinal Cord Injury in the  
348 Adult Rat. *Front. Neurosci.*, **6**, 1–16.
- 349 Gage, F.H. (2000) Mammalian Neural Stem Cells. *Science (80-. )*, **287**, 1433–1438.
- 350 Grande, A., Sumiyoshi, K., López-Juárez, A., Howard, J., Sakthivel, B., Aronow, B.,  
351 Campbell, K., & Nakafuku, M. (2013) Environmental impact on direct neuronal  
352 reprogramming in vivo in the adult brain. *Nat. Commun.*, **4**, 2373.
- 353 Hou, S.W., Wang, Y.Q., Xu, M., Shen, D.H., Wang, J.J., Huang, F., Yu, Z., & Sun, F.Y.  
354 (2008) Functional integration of newly generated neurons into striatum after cerebral  
355 ischemia in the adult rat brain. *Stroke*, **39**, 2837–2844.
- 356 Jure, I., Pietranera, L., De Nicola, A.F., & Labombarda, F. (2017) Spinal Cord Injury Impairs  
357 Neurogenesis and Induces Glial Reactivity in the Hippocampus. *Neurochem. Res.*, **0**, 1–  
358 13.
- 359 Kempermann, G., Gast, D., & Gage, F.H. (2002) Neuroplasticity in old age: sustained  
360 fivefold induction of hippocampal neurogenesis by long-term environmental enrichment.  
361 *Ann. Neurol.*, **52**, 135–143.
- 362 Kempermann, G., Kuhn, H.G., & Gage, F.H. (1997) More hippocampal neurons in adult mice  
363 living in an enriched environment. *Nature*, **386**, 493–495.
- 364 Kirby, E.D., Muroy, S.E., Sun, W.G., Covarrubias, D., Leong, M.J., Barchas, L. a, & Kaufer,  
365 D. (2013) Acute stress enhances adult rat hippocampal neurogenesis and activation of  
366 newborn neurons via secreted astrocytic FGF2. *Elife*, **2**, e00362.
- 367 Kirchhoff, S., Sebens, T., Baumann, S., Krueger, A., Zawatzky, R., Li-Weber, M., Meinl, E.,

- 368 Neipel, F., Fleckenstein, B., & Krammer, P.H. (2002) Viral IFN-Regulatory Factors  
369 Inhibit Activation-Induced Cell Death Via Two Positive Regulatory IFN-Regulatory  
370 Factor 1-Dependent Domains in the CD95 Ligand Promoter. *J. Immunol.*, **168**, 1226–  
371 1234.
- 372 Kobilo, T., Liu, Q.-R., Gandhi, K., Mughal, M., Shaham, Y., & van Praag, H. (2011) Running  
373 is the neurogenic and neurotrophic stimulus in environmental enrichment. *Learn. Mem.*,  
374 **18**, 605–609.
- 375 Kropff, E., Yang, S.M., & Schinder, A.F. (2015) Dynamic role of adult-born dentate granule  
376 cells in memory processing. *Curr. Opin. Neurobiol.*, **35**, 21–26.
- 377 LaDage, L.D. (2015) Environmental Change, the Stress Response, and Neurogenesis. *Integr.*  
378 *Comp. Biol.*, 1–12.
- 379 Letellier, E., Kumar, S., Sancho-Martinez, I., Krauth, S., Funke-Kaiser, A., Laudenklos, S.,  
380 Konecki, K., Klussmann, S., Corsini, N.S., Kleber, S., Drost, N., Neumann, A., Lévi-  
381 Strauss, M., Brors, B., Gretz, N., Edler, L., Fischer, C., Hill, O., Thiemann, M., Biglari,  
382 B., Karray, S., & Martin-Villalba, A. (2010) CD95-Ligand on Peripheral Myeloid Cells  
383 Activates Syk Kinase to Trigger Their Recruitment to the Inflammatory Site. *Immunity*,  
384 **32**, 240–252.
- 385 Leuner, B., Waddell, J., Gould, E., & Shors, T.J. (2006) Temporal discontinuity is neither  
386 necessary nor sufficient for learning-induced effects on adult neurogenesis. *J. Neurosci.*,  
387 **26**, 13437–13442.
- 388 Lim, D.A. & Alvarez-Buylla, A. (2016) The Adult Ventricular – Subventricular Zone (V-  
389 SVZ) and Olfactory Bulb (OB) Neurogenesis. *Cold Spring Harb. Perspect. Biol.*, **8**.
- 390 Liu, F., You, Y., Li, X., Ma, T., Nie, Y., Wei, B., Li, T., Lin, H., & Yang, Z. (2009) Brain  
391 injury does not alter the intrinsic differentiation potential of adult neuroblasts. *J.*  
392 *Neurosci.*, **29**, 5075–5087.
- 393 Lledo, P.-M., Alonso, M., & Grubb, M.S. (2006) Adult neurogenesis and functional plasticity  
394 in neuronal circuits. *Nat. Rev. Neurosci.*, **7**, 179–193.
- 395 Llorens-Bobadilla, E., Zhao, S., Baser, A., Saiz-Castro, G., Zwadlo, K., & Martin-Villalba, A.  
396 (2015) Single-Cell Transcriptomics Reveals a Population of Dormant Neural Stem Cells  
397 that Become Activated upon Brain Injury. *Cell Stem Cell*, **17**, 1–12.
- 398 Ming, G.-L. & Song, H. (2011) Adult neurogenesis in the mammalian brain: significant  
399 answers and significant questions. *Neuron*, **70**, 687–702.



- 400 Mirzadeh, Z., Doetsch, F., Sawamoto, K., Wichterle, H., & Alvarez-Buylla, A. (2010) The  
401 subventricular zone en-face: wholemount staining and ependymal flow. *J. Vis. Exp.*, **39**.
- 402 Mustroph, M.L., Chen, S., Desai, S.C., Cay, E.B., DeYoung, E.K., & Rhodes, J.S. (2012)  
403 Aerobic exercise is the critical variable in an enriched environment that increases  
404 hippocampal neurogenesis and water maze learning in male C57BL/6J mice.  
405 *Neuroscience*, **219**, 62–71.
- 406 Nakatomi, H., Kuriu, T., Okabe, S., Yamamoto, S. ichi, Hatano, O., Kawahara, N., Tamura,  
407 A., Kirino, T., & Nakafuku, M. (2002) Regeneration of hippocampal pyramidal neurons  
408 after ischemic brain injury by recruitment of endogenous neural progenitors. *Cell*, **110**,  
409 429–441.
- 410 Nilsson, M., Perfilieva, E., Johansson, U., Orwar, O., & Eriksson, P.S. (1999) Enriched  
411 environment increases neurogenesis in the adult rat dentate gyrus and improves spatial  
412 memory. *J. Neurobiol.*, **39**, 569–578.
- 413 Parent, J.M., Vexler, Z.S., Gong, C., Derugin, N., & Ferriero, D.M. (2002) Rat forebrain  
414 neurogenesis and striatal neuron replacement after focal stroke. *Ann. Neurol.*, **52**, 802–  
415 813.
- 416 Rodgers, J.T., King, K.Y., Brett, J.O., Cromie, M.J., Charville, G.W., Maguire, K.K.,  
417 Brunson, C., Mastey, N., Liu, L., Tsai, C.-R., Goodell, M. a, & Rando, T. a (2014)  
418 mTORC1 controls the adaptive transition of quiescent stem cells from G0 to G(Alert).  
419 *Nature*, **509**, 393–396.
- 420 Sahay, A. & Hen, R. (2007) Adult hippocampal neurogenesis in depression. *Nat. Neurosci.*,  
421 **10**, 1110–1115.
- 422 Shors, T.J., Miesegaes, G., Beylin, a, Zhao, M., Rydel, T., & Gould, E. (2001) Neurogenesis  
423 in the adult is involved in the formation of trace memories. *Nature*, **410**, 372–376.
- 424 Snyder, J.S., Soumier, A., Brewer, M., Pickel, J., & Cameron, H. a (2011) Adult hippocampal  
425 neurogenesis buffers stress responses and depressive behaviour. *Nature*, **476**, 458–461.
- 426 Stieltjes, B., Klussmann, S., Bock, M., Umathum, R., Mangalathu, J., Letellier, E., Rittgen,  
427 W., Edler, L., Krammer, P.H., Kauczor, H.U., Martin-Villalba, A., & Essig, M. (2006)  
428 Manganese-enhanced magnetic resonance imaging for in vivo assessment of damage and  
429 functional improvement following spinal cord injury in mice. *Magn. Reson. Med.*, **55**,  
430 1124–1131.
- 431 Taupin, P. & Gage, F.H. (2002) Adult neurogenesis and neural stem cells of the central

- 432 nervous system in mammals. *J. Neurosci. Res.*, **69**, 745–749.
- 433 Thored, P., Arvidsson, A., Cacci, E., Ahlenius, H., Kallur, T., Darsalia, V., Ekdahl, C.T.,  
434 Kokaia, Z., & Lindvall, O. (2006) Persistent production of neurons from adult brain stem  
435 cells during recovery after stroke. *Stem Cells*, **24**, 739–747.
- 436 van Praag, H., Christie, B.R., Sejnowski, T.J., & Gage, F.H. (1999) Running enhances  
437 neurogenesis, learning, and long-term potentiation in mice. *Proc. Natl. Acad. Sci. U. S.*  
438 *A.*, **96**, 13427–13431.
- 439 van Praag, H., Kempermann, G., & Gage, F.H. (1999) Running increases cell proliferation  
440 and neurogenesis in the adult mouse dentate gyrus. *Nat. Neurosci.*, **2**, 266–270.
- 441 van Praag, H., Shubert, T., Zhao, C., & Gage, F.H. (2005) Exercise enhances learning and  
442 hippocampal neurogenesis in aged mice. *J. Neurosci.*, **25**, 8680–8685.
- 443 Walker, T.L. & Kempermann, G. (2014) One mouse, two cultures: isolation and culture of  
444 adult neural stem cells from the two neurogenic zones of individual mice. *J. Vis. Exp.*,  
445 **84**.
- 446 Wilson, A., Laurenti, E., Oser, G., van der Wath, R.C., Blanco-Bose, W., Jaworski, M.,  
447 Offner, S., Dunant, C.F., Eshkind, L., Bockamp, E., Lió, P., MacDonald, H.R., &  
448 Trumpp, A. (2008) Hematopoietic Stem Cells Reversibly Switch from Dormancy to  
449 Self-Renewal during Homeostasis and Repair. *Cell*, **135**, 1118–1129.
- 450 Zhao, C., Deng, W., & Gage, F.H. (2008) Mechanisms and Functional Implications of Adult  
451 Neurogenesis. *Cell*, **132**, 645–660.
- 452

Figure 1

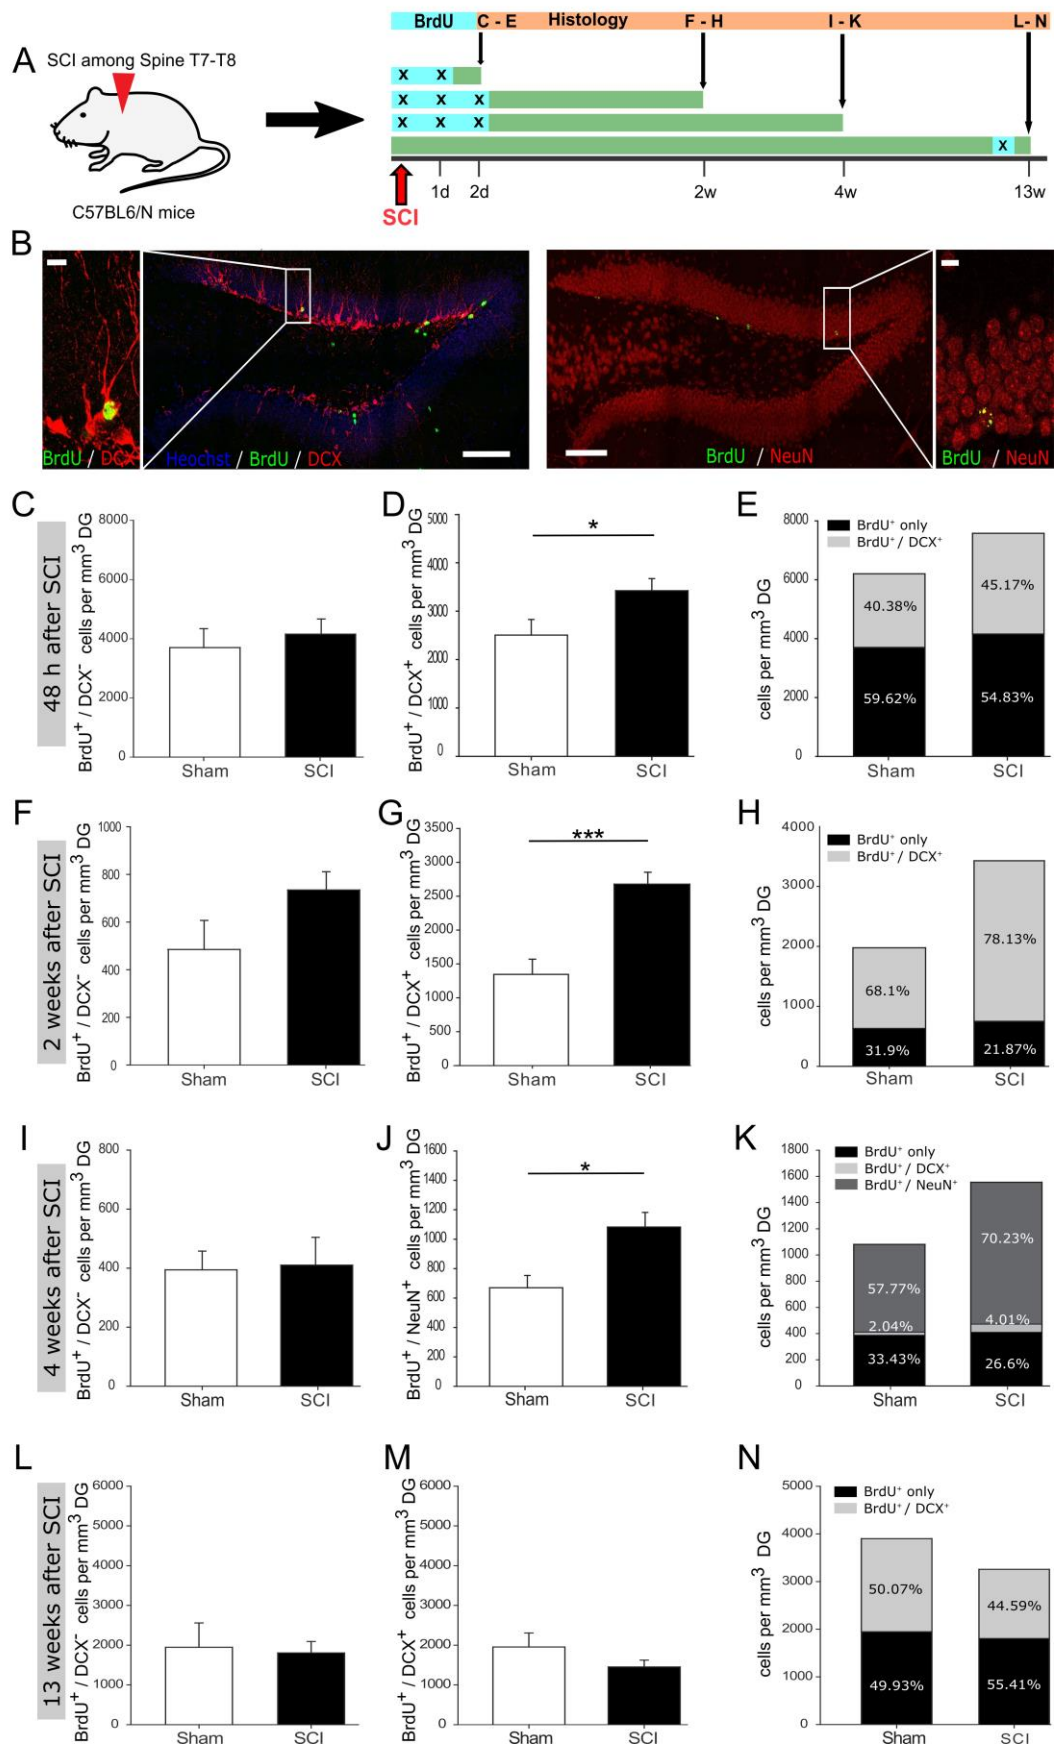

453

454

455 **Figure 1: Increased hippocampal neurogenesis upon distant spinal cord injury**

456 (A) Schematic illustration of experimental timeline performed with C57BL/6N mice. (B)  
457 BrdU incorporation within the dentate gyrus of adult mice. Scale bar is 100  $\mu\text{m}$  or 10  $\mu\text{m}$ ,  
458 respectively. (C) Quantification of BrdU<sup>+</sup>/DCX<sup>-</sup> cells 48 h post injury, mean values ( $\pm$  SEM)  
459 from sham ( $3698 \pm 561$  cells/ $\text{mm}^3$  DG) vs. SCI ( $4156 \pm 434$  cells/ $\text{mm}^3$  DG) mice, group size  
460  $n_{\text{sham}}=6$  vs.  $n_{\text{SCI}}=6$ . (D) Quantification of BrdU<sup>+</sup>/DCX<sup>+</sup> cells 48 h post injury, mean values  
461 ( $\pm$  SEM) from sham ( $2505 \pm 323$  cells/ $\text{mm}^3$  DG) vs. SCI ( $3422 \pm 249$  cells/ $\text{mm}^3$  DG) mice,  
462 group size  $n_{\text{sham}}=6$  vs.  $n_{\text{SCI}}=6$ , \* $p < 0.05$  (Student's t-test). (E) Percentage distribution of  
463 BrdU<sup>+</sup>/DCX<sup>+</sup> cells in sham (40.38%) and SCI (45.17%) mice, 48 h following injury. (F)  
464 Quantification of BrdU<sup>+</sup>/DCX<sup>-</sup> cells two weeks post injury, mean values ( $\pm$ SEM) from sham  
465 ( $485 \pm 109$  cells/ $\text{mm}^3$  DG) vs. SCI ( $734 \pm 70$  cells/ $\text{mm}^3$  DG) mice, group size  $n_{\text{sham}}=5$  vs.  $n_{\text{SCI}}=6$ .  
466 (G) Quantification of BrdU<sup>+</sup>/DCX<sup>+</sup> cells two weeks post injury, mean values ( $\pm$  SEM)  
467 from sham ( $1345 \pm 224$  cells/ $\text{mm}^3$  DG) vs. SCI ( $2677 \pm 175$  cells/ $\text{mm}^3$  DG) mice, group size  
468  $n_{\text{sham}}=6$  vs.  $n_{\text{SCI}}=6$ , \*\*\* $p < 0.001$  (Student's t-test). (H) Percentage distribution of  
469 BrdU<sup>+</sup>/DCX<sup>+</sup> cells in sham (68.1%) and SCI (78.13%) mice, two weeks following injury. (I)  
470 Quantification of BrdU<sup>+</sup>/DCX<sup>-</sup> cells four weeks post injury, mean values ( $\pm$  SEM) from sham  
471 ( $394 \pm 57$  cells/ $\text{mm}^3$  DG) vs. SCI ( $410 \pm 86$  cells/ $\text{mm}^3$  DG) mice, group size  $n_{\text{sham}}=5$  vs.  $n_{\text{SCI}}=6$ .  
472 (J) Quantification of BrdU<sup>+</sup>/NeuN<sup>+</sup> cells four weeks post injury, mean values ( $\pm$  SEM)  
473 from sham ( $669 \pm 83$  cells/ $\text{mm}^3$  DG) vs. SCI ( $1082 \pm 99$  cells/ $\text{mm}^3$  DG) mice, group size  
474  $n_{\text{sham}}=6$  vs.  $n_{\text{SCI}}=6$ , \* $p < 0.05$  (Student's t-test). (K) Percentage distribution of BrdU<sup>+</sup>/NeuN<sup>+</sup>  
475 cells in sham (57.77%) and SCI (70.23%) mice and BrdU<sup>+</sup>/DCX<sup>+</sup> cells in sham (2.04%) and  
476 SCI (4.01%) mice, four weeks following injury. (L) Quantification of BrdU<sup>+</sup>/DCX<sup>-</sup> cells 13  
477 weeks post injury, mean values ( $\pm$  SEM) from sham ( $1947 \pm 558$  cells/ $\text{mm}^3$  DG) vs. SCI  
478 ( $1805 \pm 270$  cells/ $\text{mm}^3$  DG) mice, group size  $n_{\text{sham}}=6$  vs.  $n_{\text{SCI}}=8$ . (M) Quantification of  
479 BrdU<sup>+</sup>/DCX<sup>+</sup> cells 13 weeks post injury, mean values ( $\pm$  SEM) from sham ( $2005 \pm 382$   
480 cells/ $\text{mm}^3$  DG) vs. SCI ( $1452 \pm 159$  cells/ $\text{mm}^3$  DG) mice, group size  $n_{\text{sham}}=5$  vs.  $n_{\text{SCI}}=8$ . (N)  
481 Percentage distribution of BrdU<sup>+</sup>/DCX<sup>+</sup> cells in sham (50.07%) and SCI (44.59%) mice, 13  
482 weeks following injury.

Figure 2

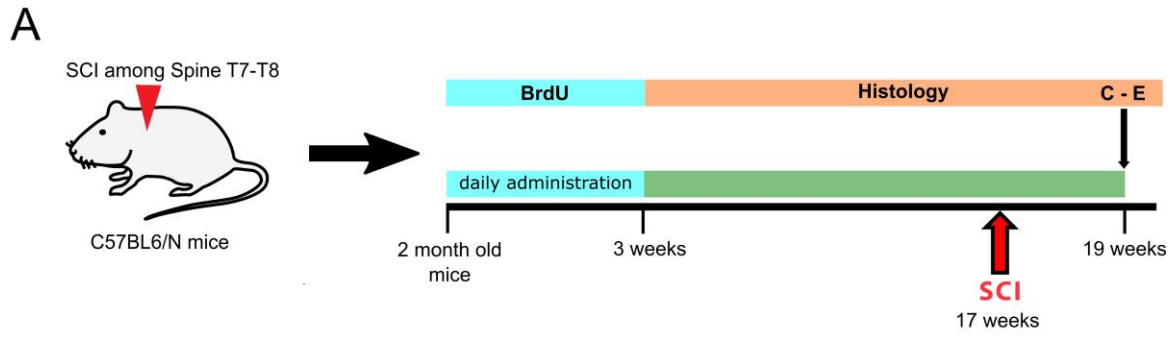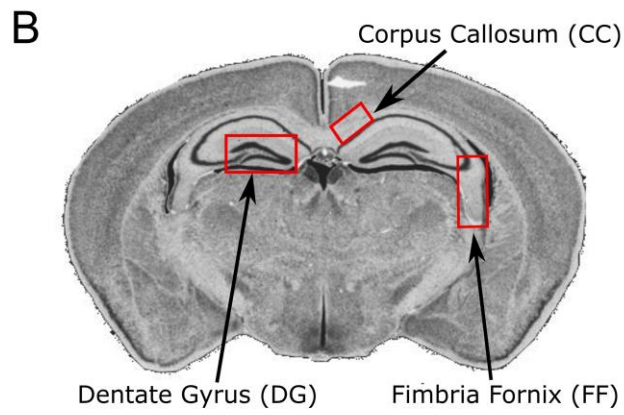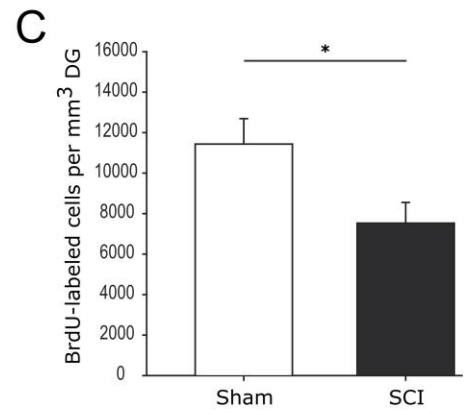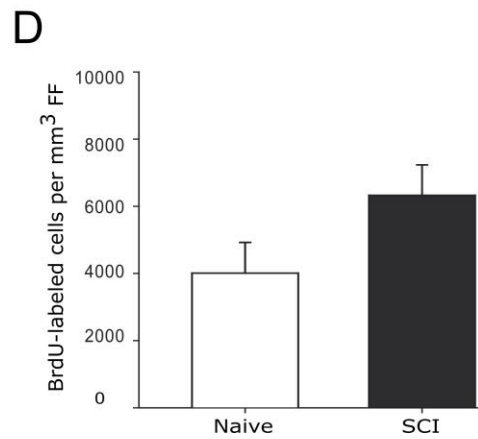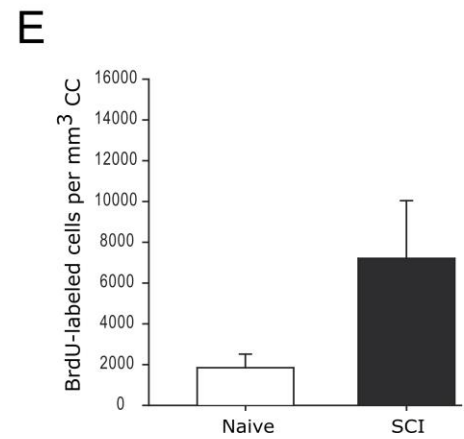

483

484

485 **Figure 2: Dormant NSCs are activated following spinal transection injury**

486 (A) Schematic illustration of the experimental timeline for labeling dormant NSCs in the DG  
487 of adult C57BL/6N mice. (B) Representative coronal section of the adult mouse brain with  
488 designated regions for the quantification of BrdU<sup>+</sup> labeled cells. (C) Quantification of BrdU<sup>+</sup>  
489 labeled cells in the DG, mean values ( $\pm$  SEM) from sham ( $11437 \pm 1255$  cells/ mm<sup>3</sup> DG) vs.  
490 SCI ( $7532 \pm 1017$  cells /mm<sup>3</sup> DG) mice, group size  $n_{\text{sham}}=5$  vs.  $n_{\text{SCI}}=11$ , \* $p < 0.05$  (Student's  
491 t-test). (D) Quantification of BrdU<sup>+</sup> labeled cells in the FF, mean values ( $\pm$  SEM) from naive  
492 ( $4010 \pm 913$  cells/ mm<sup>3</sup> FF) vs. SCI ( $6326 \pm 906$  cells /mm<sup>3</sup> FF) mice, group size  $n_{\text{naive}}=4$  vs.  
493  $n_{\text{SCI}}=6$ . (E) Quantification of BrdU<sup>+</sup> labeled cells in the CC, mean values ( $\pm$  SEM) from naive  
494 ( $1848 \pm 665$  cells/ mm<sup>3</sup> CC) vs. SCI ( $7210 \pm 2829$  cells /mm<sup>3</sup> CC) mice, group size  $n_{\text{naive}}=4$   
495 vs.  $n_{\text{SCI}}=6$



Figure 3

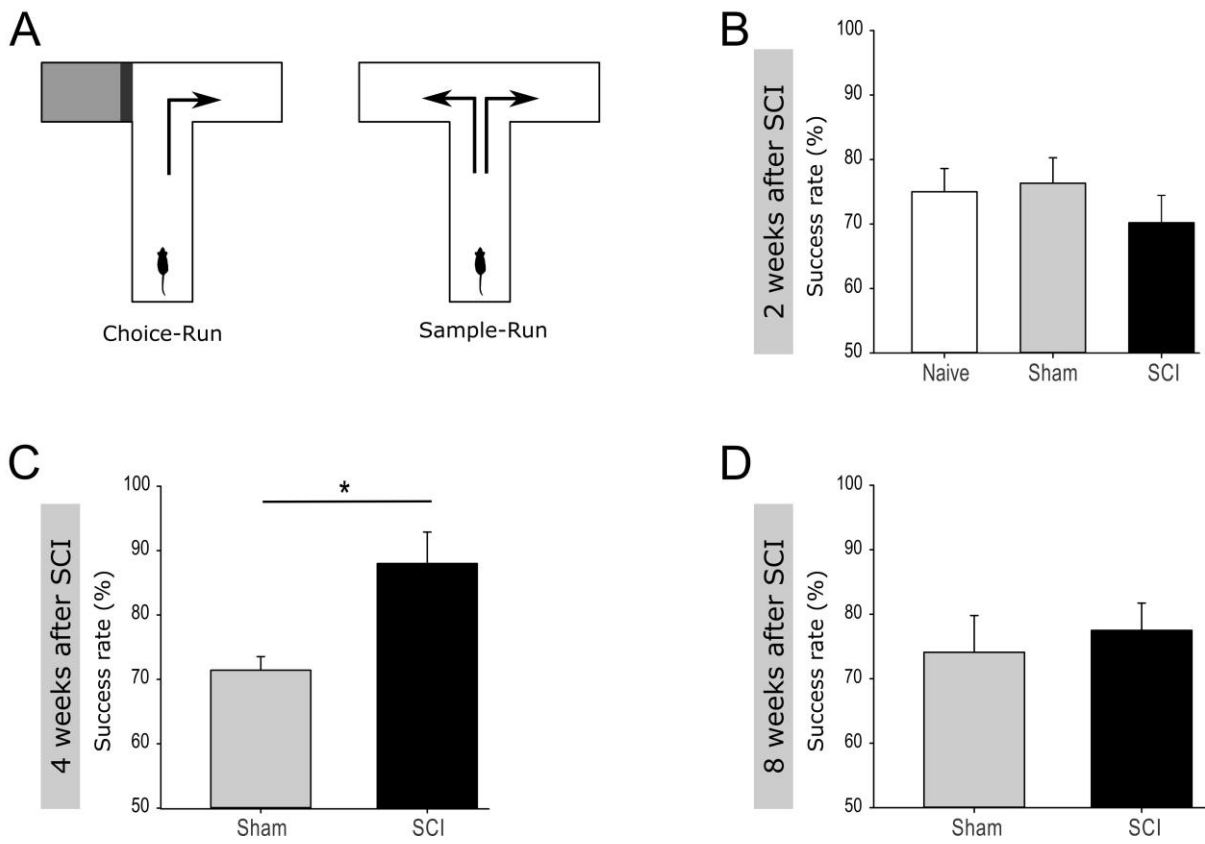

496

497

498

499 **Figure 3: Improved performance in a Working Memory task following spinal cord**  
500 **injury**

501 (A) Experimental setup for the spontaneous alternation in the T-Maze test. (B) Mean success  
502 rate ( $\pm$  SEM) of naïve ( $75\% \pm 3.29$ ) vs. sham ( $76.34\% \pm 3.80$ ) vs. SCI ( $70.19\% \pm 4.09$ ) mice,  
503 two weeks post injury, group size  $n_{\text{naïve}}=6$  vs.  $n_{\text{sham}}=14$  vs.  $n_{\text{SCI}}=13$ . (C) Mean success rate ( $\pm$   
504 SEM) of sham ( $71.43\% \pm 5.15$ ) vs. SCI ( $88\% \pm 4.38$ ) mice, four weeks post injury, group  
505 size,  $n_{\text{sham}}=7$  vs.  $n_{\text{SCI}}=5$ ,  $*p < 0.05$  (Mann-Whitney test). (D) Mean success rate ( $\pm$  SEM) of  
506 sham ( $74.11\% \pm 5.27$ ) vs. SCI ( $77.5\% \pm 3.79$ ) mice, eight weeks post injury, group size,  $n_{\text{sham}}$   
507  $=7$  vs.  $n_{\text{SCI}}=5$ .

Figure 4

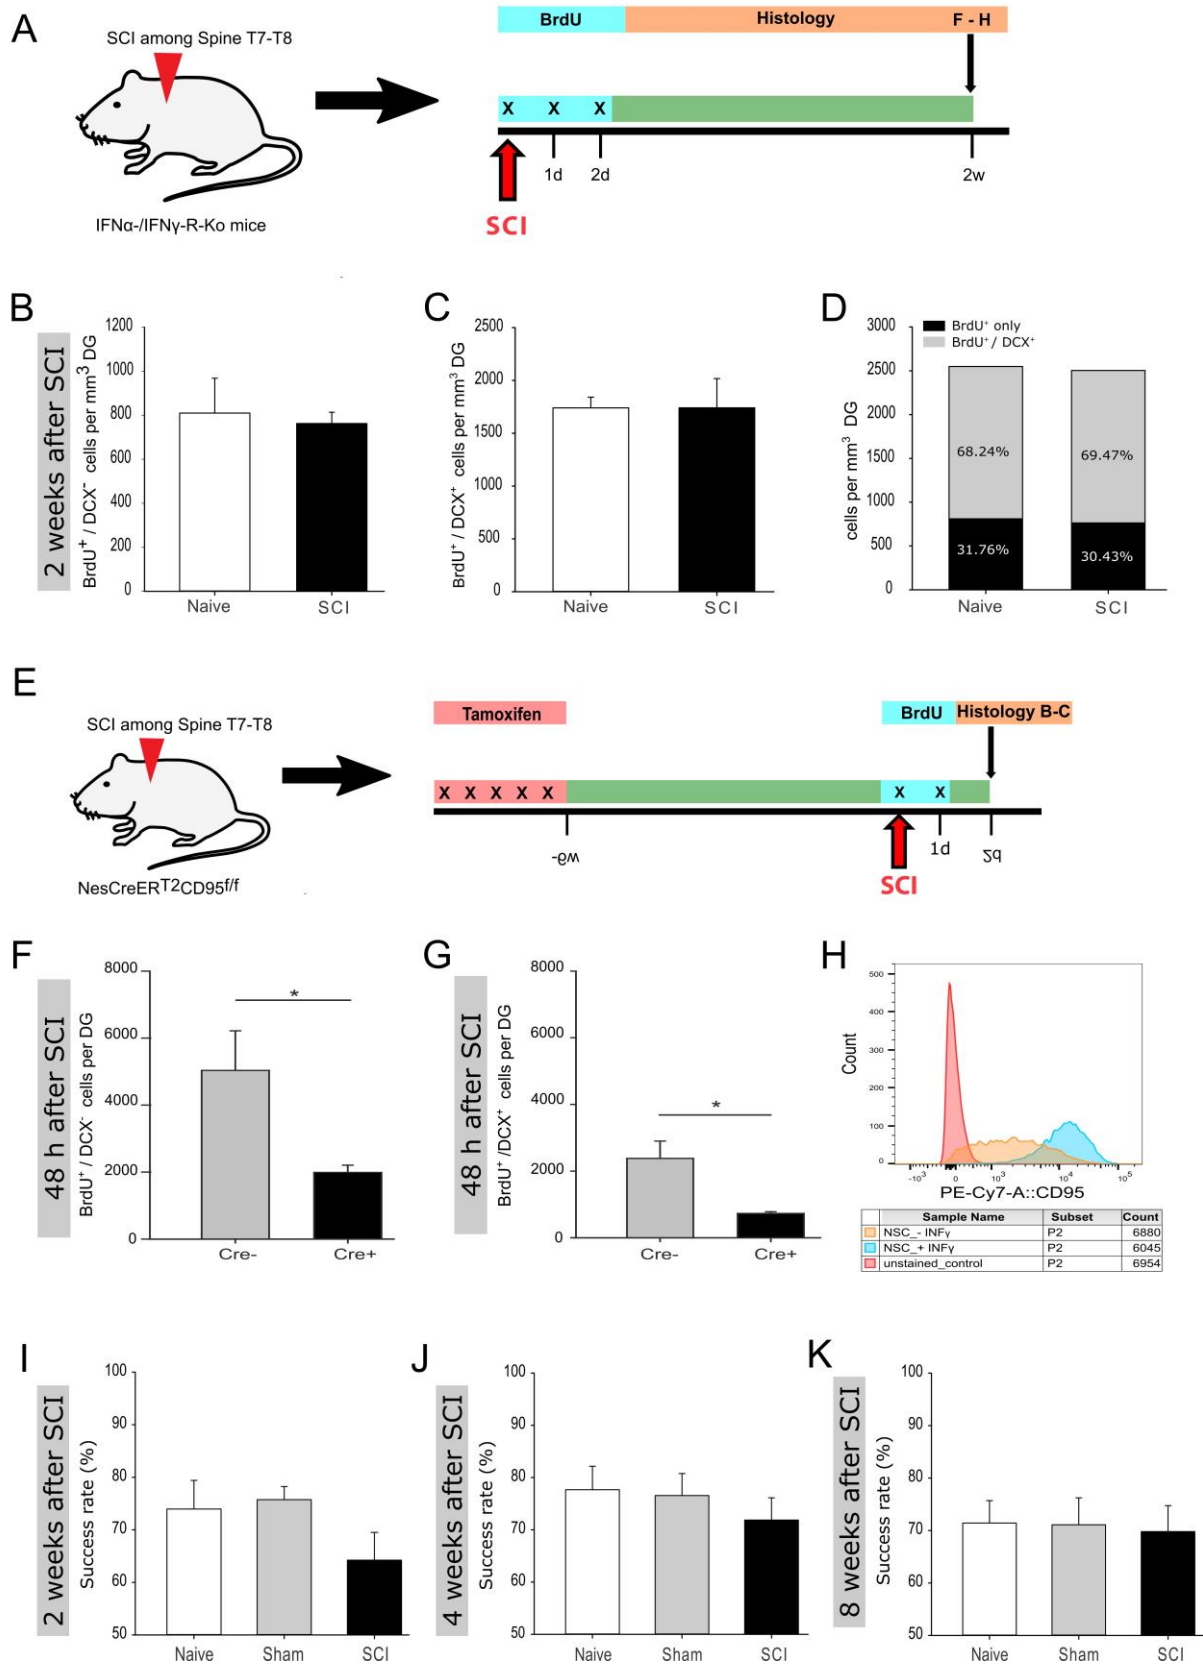

508

509

510

511 **Figure 4: Reduced activation of adult hippocampal neurogenesis in IFN $\alpha$ -/IFN $\gamma$ -R and**  
512 **CD95-Ko upon spinal cord injury**

513 (A) Illustration of the experimental timeline performed with IFN $\alpha$ -/IFN $\gamma$ -R-Ko mice. (B)  
514 Quantification of BrdU<sup>+</sup>/DCX<sup>-</sup> cells two weeks post injury, mean values ( $\pm$  SEM) from naïve  
515 ( $809 \pm 137$  cells/mm<sup>3</sup> DG) vs. SCI ( $762 \pm 46$  cells/mm<sup>3</sup> DG) mice, group size  $n_{\text{naïve}}=4$  vs.  $n_{\text{SCI}}=5$ . (C) Quantification of BrdU<sup>+</sup>/DCX<sup>+</sup> cells two weeks post injury, mean values ( $\pm$  SEM)  
516 from naïve ( $1740 \pm 88$  cells/mm<sup>3</sup> DG) vs. SCI ( $1741 \pm 247$  cells/mm<sup>3</sup> DG) mice, group size  
517  $n_{\text{naïve}}=4$  vs.  $n_{\text{SCI}}=5$ . (D) Percentage distribution of BrdU<sup>+</sup>/DCX<sup>+</sup> cells in naïve (68.24%) and  
518 SCI (69.47%) mice, two weeks following injury. (E) Illustration of the experimental timeline  
519 performed with NesCreER<sup>T2</sup>CD95<sup>fl/fl</sup> mice. (F) Quantification of BrdU<sup>+</sup>/DCX<sup>-</sup> cells 48 h post  
520 injury, mean values ( $\pm$  SEM) from injured Cre<sup>-</sup> ( $5034 \pm 2899$  cells/DG) vs. injured Cre<sup>+</sup> ( $1989$   
521  $\pm 530$  cells/DG) mice, group size  $n_{\text{Cre}^-}=6$  vs.  $n_{\text{Cre}^+}=6$ , \* $p < 0.05$  (Student's t-test). (G)  
522 Quantification of BrdU<sup>+</sup>/DCX<sup>+</sup> cells 48h post injury, mean values ( $\pm$  SEM) from injured Cre<sup>-</sup>  
523 ( $2381 \pm 1273$  cells/DG) vs. injured Cre<sup>+</sup> ( $728 \pm 126$  cells/DG) mice, group size  $n_{\text{Cre}^-}=6$  vs.  
524  $n_{\text{Cre}^+}=6$ , \* $p < 0.05$  (Student's t-test). (H) Relative CD95 expression in unstained control,  
525 INF $\gamma$ -untreated and -treated cells are illustrated in a single parameter histogram. (I) Mean  
526 success rate ( $\pm$  SEM) of naïve ( $73.96\% \pm 4.98$ ) vs. sham ( $75.75\% \pm 2.33$ ) vs. SCI ( $64.22\%$   
527  $\pm 4.62$ ) mice, two weeks post injury, group size  $n_{\text{naïve}}=6$  vs.  $n_{\text{sham}}=8$  vs.  $n_{\text{SCI}}=8$ . (J) Mean  
528 success rate ( $\pm$  SEM) of naïve ( $77.68\% \pm 4.49$ ) vs. sham ( $76.56\% \pm 3.95$ ) vs. SCI ( $71.88 \pm$   
529  $3.98$ ) mice, four weeks post injury, group size  $n_{\text{naïve}}=7$  vs.  $n_{\text{sham}}=8$  vs.  $n_{\text{SCI}}=8$ . (K) Mean  
530 success rate ( $\pm$  SEM) of naïve ( $71.43\% \pm 4.28$ ) vs. sham ( $71.09\% \pm 4.81$ ) vs. SCI ( $69.79 \pm$   
531  $3.91$ ) mice, eight weeks post injury, group size  $n_{\text{naïve}}=7$  vs.  $n_{\text{sham}}=8$  vs.  $n_{\text{SCI}}=6$ .

533

Figure S1

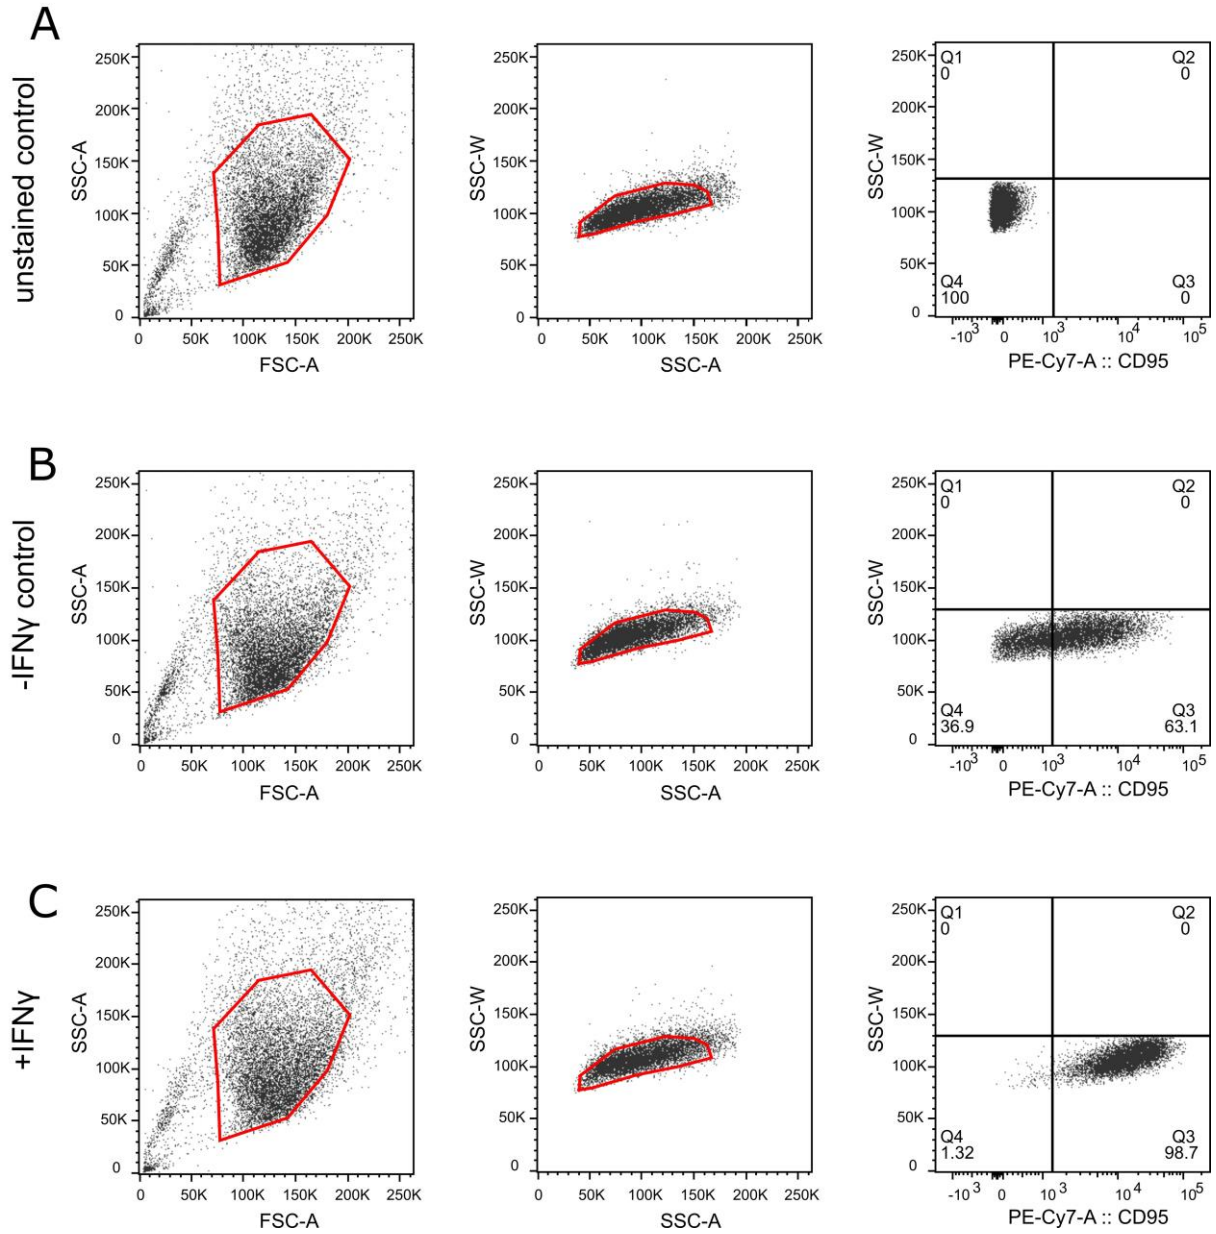

534

535

536 **Supplementary Figure S1, related to Figure 4:**

537 Strategy to determine relative CD95 expression in cultured NSCs by using Flow Cytometry.

538 First gate uses FSC/SSC gating to exclude cellular debris; second gate excludes cell

539 aggregates and third shows relative CD95 expression in unstained control cells (A), stained

540 IFN $\gamma$ -untreated cells (B) and stained IFN $\gamma$ -treated cells (C).
